# Supplementary material for: Highly selective Friedel–Crafts monoalkylation using micromixingElectronic supplementary information (ESI) available: experimental section. See http://www.rsc.org/suppdata/cc/b2/b211433j/
Source: Royal Society of Chemistry journal article supplement (doi:10.1039/b211433j), 2002-12-20
Supplement: b211433j.doc [file b211433j.doc]

***Electronic Supplementary Information***

**for**

**Highly Selective Friedel-Crafts Monoalkylation Using Micromixing**

Seiji Suga, Aiichiro Nagaki and Jun-ichi Yoshida

**Experimental Section**

**General Remarks.** GC analysis was performed on a gas chromatograph (SHIMADZU GC-14B) equipped with a flame ionization detector using a fused silica capillary. 1H and 13C NMR spectra were recorded in CDCl3 on a Varian Gemini 2000 spectrometer with Me4Si as an internal standard unless otherwise noted. NMR spectra of the carbamates were usually very broad and sometimes separated to two signals due to the existence of rotamers. Mass spectra were obtained on JEOL JMS SX-102A mass spectrometer. IR spectra were measured with a SHIMADZU FTIR 1600 spectrometer. Thin-layer chromatography (TLC) was carried out by using Merck precoated silica gel F254 plates (thickness 0.25 mm). Flush chromatography was carried out on a column of silica gel (Kanto Chem. Co., Silica Gel N, spherical, neutral, 40-100 m). All reactions were carried out under Ar atmosphere unless otherwise noted. A micromixer was purchased from Institut für Mikrotechnik Mainz GmbH (IMM). The micromixer constructed of stainless steel body has 25 m mixing channels (silver) which were fabricated by means of the LIGA (Lithographie, Galvanoformung, Abformung) process. A T-shaped tube mixer (a inside diameter, 500 m ) constructed of diflon was purchased from Hokuto Denko Cooperation. Introduction of two solutions to the mixer was performed by two syringe pumps, Harvard Model 11.

**Materials.** Dichloromethane (CH2Cl2) was washed with water, distilled from P2O5, redistilled from dried K2CO3 to remove a trace amount of acid, and stored over molecular sieves 4A.

***N*-Methoxycarbonyl-*N*-(trimethylsilylmetyl)butylamine (1).** To a suspension of sodium hydride (60 wt% dispersion in mineral oil, 7.91 g, 197 mmol) in DMF (200 mL), *N*-(methoxycarbonyl)butylamine (21.6 g, 165 mmol) was added at 0 oC. The mixture was stirred for 120 min at 60 oC and iodo(trimethylsilyl)methane (42.6 g, 199 mmol) was added at 0 oC. The reaction mixture was stirred for 14.5 h at 60 oC, and then poured into water (300 mL). The organic phase was separated and the aqueous phase was extracted with ether (300 mL x 3). The combined organic phase was dried over Na2SO4, and solvent was removed to give the crude product. After purification with flash chromatography (hexane/ethylacetate 10 : 1), the compound was further purified by distillation (120 oC, 20 mmHg) to obtain the title compound (36.0 g, 76%): *tR* = 6.92 min (column, OV-17; 0.25 mm x 25 m; oven temperature, 100 oC; rate of temperature increase, 10 oC/min): TLC *Rf* 0.54 (hexane/ethylacetate 5:1); 1H NMR (300 MHz, CDCl3)  0.03 (s, 9H), 0.90 (t, 3H, *J* = 7.2 Hz), 1.16-1.36 (m, 2H), 1.39-1.55 (m, 2H), 2.68 (s) and 2.72 (s) (total 2H, two rotamers), 3.06-3.26 (m, 2H), 3.64 (s, 3H); 13C NMR (75 MHz, CDCl3) - 1.8 and - 1.6, 13.7, 19.8, 29.4 and 29.8, 37.9 and 38.6, 48.7 and 49.3, 51.9 and 52.3, 156.6; IR (neat) 2957, 1701, 1473, 1225 cm-1; LRMS (EI) m/e 217 (M+), 202 (M+ - CH3), 186 (M+ - OMe), 158 (M+ - CO2Me); HRMS (EI) calcd for C10H23NO2Si (M+): 217.1498, found: 217.1501.

***N*-Methoxycarbonyl-*N*-(trimethylsilylmetyl)cyclohexylamine.** To a suspension of sodium hydride (60 wt% dispersion in mineral oil, 5.12 g, 128 mmol) in DMF (215 mL), *N*-(methoxycarbonyl)cyclohexylamine (16.1 g, 102 mmol) was added at 0 oC. The mixture was stirred for 120 min at 60 oC, and then iodo(trimethylsilyl)methane (26.6 g, 124 mmol) was added at 0 oC. The reaction mixture was stirred for 1.5 h at 60 oC. The reaction mixture was poured into water (200 mL). The organic phase was separated and the aqueous phase was extracted with ether (300 mL x 3). The combined organic phase was dried over Na2SO4 and solvent was removed. After purification with flash chromatography (hexane/ethylacetate 10 : 1), the compound was further purified by distillation (128 oC, 10 mmHg) to obtain the title compound (16.3 g, 79%): *tR* = 9.98 min (column, OV-17; 0.25 mm x 25 m; oven temperature, 100 oC; rate of temperature increase, 10 oC/min): TLC *Rf* 0.77 (hexane/ethylacetate 3:1); 1H NMR (300 MHz, CDCl3)  0.06 (s, 9H), 0.92-1.14 (m, 1H), 1.17-1.44 (m, 4H), 1.49-1.68 (m, 3H), 1.68-1.92 (m, 2H), 2.48 (s, 2H), 3.63 (s, 3H), 3.76-4.99 (m, 1H); 13C NMR (75 MHz, CDCl3) - 1.4, 25.4, 25.7, 30.4, 33.1 and 33.9, 51.8 and 52.2, 55.9, 156.6; IR (neat) 2932, 1698, 1456, 1246 cm-1; LRMS (EI) m/e 243 (M+), 228 (M+ - CH3), 212 (M+ - OMe), 184 (M+ - CO2Me); HRMS (EI) calcd for C12H25NO2Si (M+): 243.1655, found: 243.1657.

**Generation of Iminium Cation Pool. Typical Procedure.** The anodic oxidation was carried out in an H-type divided cell (4G glass filter) equipped with a carbon felt anode (Nippon Carbon JF-20-P7, ca. 320 mg, dried at 250 oC/1 mmHg for 1 h before use) and a platinum plate cathode (60 mm x 30 mm). In the anodic chamber was placed a solution of **1** (610.3 mg, 2.81 mmol) in 0.3 M Bu4NBF4/CH2Cl2 (56.0 mL). In the cathodic chamber were placed 0.3 M Bu4NBF4/CH2Cl2 (56.0 mL) and trifluoromethanesulfonic acid (1.05 g, 7.00 mmol). The constant current electrolysis (30 mA) was carried out at -78 oC with magnetic stirring until 2.5 F/mol of electricity was consumed.

**General Procedure of Batch Mixing.** To a solution of nucleophile (0.417 mmol) in CH2Cl2 (10 mL, cooled at -78 oC) was added a cation pool (**2**, 10 mL, cooled at -78 oC) generated from **1** (0.500 mmol) by syringe pump (flow rate, 5.0 mL/min). Immediately after mixing, the reaction was quenched by Et3N (1 mL) at the same temperature. The solvent was removed under reduced pressure and the residue was quickly filtered through a short column (10 cm) of silica gel to remove Bu4NBF4.The silica gel was washed with ether (300 mL). The combined solution was concentrated to give a crude product, which was purified by flash chromatography.

**General Procedure of T-shaped Tube** **Mixing.** A solution of nucleophile (0.417 mmol) in CH2Cl2 (10 mL, cooled at -78 oC) and a cation pool (**2**, 10 mL, cooled at -78 oC) generated from **1** (0.500 mmol) were simultaneously introduced to the T-shaped tube mixer ( = 500 m), which is dipped in a coolant at -78 oC, using syringe pumps (flow rate, 5.0 mL/min). Then, the reaction mixture coming out from the outlet of the T-shaped tube mixer was collected with a round bottom flask, and immediately quenched by Et3N (1 mL) at -78 oC. The solvent was removed under reduced pressure and the residue was quickly filtered through a short column (10 cm) of silica gel to remove Bu4NBF4.The silica gel was washed with ether (300 mL). The combined solution was concentrated to give a crude product, which was purified by flash chromatography.

**General Procedure of Micromixing.** A solution of nucleophile (0.417 mmol) in CH2Cl2 (10 mL, cooled at -78 oC) and a cation pool (**2**, 10 mL, cooled at -78 oC) generated from **1** (0.500 mmol) were simultaneously introduced to the micromixer (channel width = 25 m), which is dipped in a coolant at -78 oC, using syringe pumps (flow rate is 5.0 mL/min). Then, the reaction mixture coming out from the outlet of the micromixer was collected with a round bottom flask, and immediately quenched by Et3N (1 mL) at -78 oC. The solvent was removed under reduced pressure and the residue was quickly filtered through a short column (10 cm) of silica gel to remove Bu4NBF4.The silica gel was washed with ether (300 mL). The combined solution was concentrated to give a crude product, which was purified by flash chromatography.

**1-(*N*-Butyl-*N*-methoxycarbonylaminomethyl)-2,4,6-trimethoxybenzene (4) and 1,3-Bis(*N*-butyl-*N*-methoxycarbonylaminomethyl)-2,4,6-trimethoxybenzene (5).** The title compounds were synthesized by the reaction of a cation pool (**2**, 10 mL) generated from **1** (0.500 mmol) with 1,3,5-trimethylbenzene (70.1 mg, 0.416 mmol) by micromixing (-78 oC). Yields were determined by GC: **4** GC yield 92% (118.5 mg, *tR* 11.7 min, column, OV-1; 0.80 mm x 1 m; oven temperature, 100 oC; rate of temperature increase, 10 oC/min): TLC *Rf* 0.49 (hexane/ethylacetate 1:1): 1H NMR (300 MHz, CDCl3)  0.84 (t, 3H, *J* = 7.2 Hz), 1.11-1.30 (m, 2H), 1.35-1.48 (m, 2H), 2.93-3.08 (m, 2H), 3.63-3.80 (m, 9H), 3.81 (s, 3H), 4.45-4.58 (m, 2H), 6.10 (s, 2H); 13C NMR (75 MHz, CDCl3)  13.8, 19.9, 29.5 and 30.1, 37.7 and 37.8, 44.2 and 44.7, 52.1, 55.2, 55.5, 90.1, 105.8, 156. 8, 156.0, 160.8; IR (neat) 2957, 1697, 1608, 1498, 1151 cm-1; LRMS (EI) m/e 311 (M+), 280 (M+ - OMe), 252 (M+ - CO2Me), 181 (M+ - NBuCO2Me); HRMS (EI) calcd for C16H25NO5 (M+): 311.1733, found: 311.1733: **5** GC yield 4% (7.6 mg, *tR* 16.7 min, column, OV-1; 0.80 mm x 1 m; oven temperature, 100 oC; rate of temperature increase, 10 oC/min): TLC *Rf* 0.37 (hexane/EtOAc 1:1): 1H NMR (300 MHz, CDCl3)  0.81 (t, 6H, *J* = 7.2 Hz), 1.09-1.28 (m, 4H), 1.29-1.43 (m, 4H), 2.86-3.07 (m, 4H), 3.59-3.79 (m, 9H), 3.80 (s, 6H), 4.50 (s) and 4.55 (s) (total 4H, two rotamers), 6.23 (s, 1H); 13C NMR (75 MHz, CDCl3)  14.0, 20.2, 29.8 and 30.3, 38.8, 44.5 and 45.1, 52.6, 55.8, 62.6, 91.3, 111.2, 157.1, 160.0; IR (neat) 2957,1698, 1609, 1152 cm-1; LRMS (EI) m/e 454 (M+), 423 (M+ - OMe), 395 (M+ - CO2Me); HRMS (EI) calcd for C23H38N2O7 (M+): 454.2679, found: 454.2682.

**NMR Analysis of the Pool of Iminium Cation 2 generated from 1.** 1H and 13C NMR spectra were recorded in CD2Cl2 on a JEOL A-500 spectrometer. Chemical shifts are reported using methylene signals at  5.32 (1H NMR) and  53.80 (13C NMR) as standards. The anodic oxidation was carried out in a divided cell equipped with a carbon felt anode and a platinum plate cathode. In the anodic chamber was placed a solution of **1** (45.0 mg, 0.206 mmol) in 4.0 mL of 0.3 M Bu4NBF4/CD2Cl2. In the cathodic chamber were placed trifluoromethanesulfonic acid (72.3 mg, 0.482 mmol) and 0.3 M Bu4NBF4/CD2Cl2 (4.0 mL). The constant current electrolysis (5.0 mA) was carried out at -78 oC with magnetic stirring. After 2.5 F/mol of electricity was consumed, the reaction mixture of the anodic chamber was transferred to a 5 mm NMR tube with a septum cap under Ar atmosphere at -78 oC. The NMR measurement was carried out at -80 oC: 1H NMR (500 MHz, CD2Cl2, selected)  4.01-4.20 (m, 5H), 8.56 (s, 1H), 8.83 (s, 1H); 13C NMR (125.65 MHz, CD2Cl2, selected)  174.7, 147.3, 58.6, 56.6, 29.3. In the NMR spectra the other signals could not be assigned because of overlap of the signals of Bu4NBF4 used as electrolyte.

**2-(*N*-Butyl-*N*-methoxycarbonylaminomethyl)thiophene (6, X = S).** The title compound was synthesized by the reaction ofa cation pool (**2**,10.0 mL) generated from **1** (0.501 mmol) with thiophene (34.9 mg, 0.415 mmol) by micromixing (-78 oC): Isolated yield 84% (79.2 mg, purified with flash chromatography, hexane/ethylacetate 15:1): TLC *Rf* 0.63 (hexane/ethylacetate 3:1): 1H NMR (300 MHz, CDCl3)  0.89 (t, 3H, *J* = 7.5 Hz), 1.20-1.40 (m, 2H), 1.41-1.60 (m, 2H), 3.12-3.35 (m, 2H), 3.72 (s, 3H), 4.55 (s) and 4.60 (s) (total 2H, two rotamers), 6.83-7.02 (m, 2H), 7.16-7.22 (m 1H); 13C NMR (75 MHz, CDCl3)  13.5, 19.6, 29.6 and 29.9, 44.9, 45.5 and 46.2, 52.2, 124.8, 125.5 and 126.0, 126.2, 140.4, 156.0 and 156.6; IR (neat) 2957, 1700, 1474, 1223 cm-1; LRMS (EI) m/e 227 (M+), 212 (M+ - CH3), 184 (M+ - C3H7), 97 (M+ - C6H12NO2); HRMS (EI) calcd for C11H17NO2S (M+): 227.0980, found: 227.0979.

**2,5-Bis(*N*-butyl-*N*-methoxycarbonylaminomethyl)thiophene (7, X = S).** The title compound was formed, together with **6 (X = S)**, by the reaction of a cation pool (**2**, 10.0 mL) generated from **1** (0.498 mmol) with thiophene (34.9 mg, 0.415 mmol) by batch mixing (-78 oC): Isolated yield 27% (42.5 mg, purified with flash chromatography, hexane/ethylacetate 10:1): TLC *Rf* 0.37 (hexane/ethylacetate 3:1): 1H NMR (300 MHz, CDCl3)  0.90 (t, 6H, *J* = 7.2 Hz), 1.20-1.40 (m, 4H), 1.41-1.60 (m, 4H), 3.12-3.35 (m, 4H), 3.74 (s, 6H), 4.49 (s) and 4.54 (s) (total 4H, two rotamers), 6.70-6.90 (m, 2H); 13C NMR (125.65 MHz, CDCl3)  13.8, 19.9, 29.8 and 30.2, 45.3 and 45.5, 45.9 and 46.5, 52.6, 125.3 and 125.7, 140.6, 156.3 and 156.9; IR (neat) 2957, 1700, 1471, 1230 cm-1; LRMS (FAB) m/e 371 (MH+), 240 (MH+ - NBuCO2Me); HRMS (FAB) calcd for C18H31N2O4S (MH+): 371.2005, found: 371.2006.

*N*,*N*'-Dimethoxycarbonyl-*N*,*N*'-dibutyl-2,3-diaminoethane was also formed in18% yield (purified with flash chromatography, hexane/ethylacetate 10:1): TLC *Rf* 0.37 (hexane/ethylacetate 3:1): 1H NMR (300 MHz, CDCl3)  0.92 (t, 6H, *J* = 6.9 Hz), 1.20-1.39 (m, 4H), 1.40-1.57 (m, 4H), 3.12-3.39 (m, 8H), 3.69 (s, 6H); 13C NMR (125.65 MHz, CDCl3)  13.8, 19.9, 30.3 and 30.8, 44.9 and 45.4 and 45.6 and 46.3 and 47.7, 47.9 and 48.0, 52.4, 156.6 and 157.0; IR (neat) 2959, 1700, 1480, 1229 cm-1; LRMS (EI) m/e 288 (M+), 257 (M+ - OMe), 229 (M+ - CO2Me); HRMS (EI) calcd for C14H28N2O4 (M+): 288.2049, found: 288.2045.

**2-(*N*-Butyl-*N*-methoxycarbonylaminomethyl)furan (6, X = O).** The title compound was formed by the reaction of a cation pool (**2**, 5.0 mL) prepared from **1** (0.249 mmol) with furan (18.9 mg, 0.205 mmol) by micromixing (-78 oC): Isolated yield 39% (16.9 mg, purified with flash chromatography, hexane/ethylacetate 15:1): TLC *Rf* 0.59 (hexane/ethylacetate 3:1): 1H NMR (300 MHz, CDCl3)  0.90 (t, 3H, *J* = 7.2 Hz), 1.20-1.39 (m, 2H), 1.40-1.57 (m, 2H), 3.14-3.36 (m, 2H), 3.72 (s, 3H), 4.34-4.50 (m, 2H), 6.15-6.30 (m 1H), 6.31 (s, 1H), 7.35 (s, 1H); 13C NMR (75 MHz, CDCl3)  13.7, 19.8, 29.7 and 30.1, 43.3, 46.1 and 46.8, 52.5, 107.5 and 108.0, 110.2, 141.9, 151.5, 155.8 and 156.9; IR (neat) 2963, 1690, 1482, 1238 cm-1; LRMS (EI) m/e 211 (M+), 196 (M+ - CH3), 168 (M+ - C3H7), 81 (M+ - C6H12NO2); HRMS (EI) calcd for C11H17NO3 (M+): 211.1208, found: 211.1205.

**2,5-Bis(*N*-butyl-*N*-methoxycarbonylaminomethyl)furan (7, X = O).** The title compound was synthesized, together with **6 (X = O)**, by the reaction of a cation pool (**2**, 10.0 mL) generated from **1** (0.498 mmol) with furan (27.9 mg, 0.410 mmol) by batch mixing (-78 oC): Isolated yield 5% (7.1 mg, purified with flash chromatography, hexane/ethylacetate 10:1): TLC *Rf* 0.37 (hexane/ethylacetate 3:1): 1H NMR (300 MHz, CDCl3)  0.90 (t, 6H, *J* = 7.2 Hz), 1.20-1.39 (m, 4H), 1.40-1.57 (m, 4H), 3.14-3.36 (m, 4H), 3.71 (s, 6H), 4.34 (s) and 4.41 (s) (total 4H, two rotamers) 6.05-6.21 (m, 2H); 13C NMR (125.65 MHz, CDCl3)  13.7, 19.8, 29.8 and 30.2, 43.3 and 43.5, 46.2 and 46.9, 52.5, 108.2 and 108.8, 151.1, 156.5 and 156.8; IR (neat) 2959, 1700, 1474, 1221 cm-1; LRMS (EI) m/e 354 (M+), 295 (M+ - CO2Me), 223 (M+ - NBuCO2Me); HRMS (EI) calcd for C18H30N2O5 (M+): 354.2155, found: 354.2153.

**(*N*-Butyl-*N*-methoxycarbonylaminomethyl)-*N*-methylpyrrole (6, X = N) and Bis(*N*-butyl-*N*-methoxycarbonylaminomethyl)-*N*-methylpyrrole (7, X = N).** The title compounds were synthesized by the reaction of a cation pool (**2**, 5.0 mL) generated from **1** (0.249 mmol) with *N*-methylpyrrole (16.8 mg, 0.207 mmol) by micromixing (-78 oC): (*N*-Butyl-*N*-methoxycarbonylaminomethyl)-*N*-methylpyrrole (a mixture of 2- and 3- substituted product):Isolated yield 60% (28.0 mg, purified with flash chromatography, hexane/ethylacetate 15:1): Spectra of the 2-substituted product were as follows: TLC *Rf* 0.43 (hexane/ethylacetate 3:1): 1H NMR (300 MHz, CDCl3)  0.87 (t, 3H, *J* = 7.2 Hz), 1.18-1.46 (m, 4H), 2.80-3.22 (m, 2H), 3.55 (s, 3H), 3.73 (s, 3H), 4.48 (s, 2H), 6.01-6.07 (m 2H), 6.59-6.61 (m, 1H); 13C NMR (75 MHz, CDCl3)  13.6 and 13.8, 19.9 and 20.1, 29.6, 33.8, 41.6, 44.1, 52.5, 106.7 and 107.8, 110.0, 122.5 and 123.8, 127.8, 156.9; IR (neat) 2957, 1700, 1472, 1221 cm-1; LRMS (EI) m/e 224 (M+), 209 (M+ - CH3), 94 (M+ - C6H12NO2); HRMS (EI) calcd for C12H20N2O2 (M+): 224.1525, found: 224.1526; Bis(*N*-butyl-*N*-methoxycarbonylaminomethyl)-*N*-methylpyrrole (a mixture of isomers): Isolated yield 6% (4.5 mg, purified with flash chromatography, hexane/ethylacetate 3:1): TLC *Rf* 0.29 (hexane/ethylacetate 3:1): 1H NMR (300 MHz, CDCl3)  0.88-0.98 (m, 6H) 1.15-1.58 (m, 8H), 2.92-3.25 (m, 4H), 3.42 (s) and 3.50 (s) (total 3H, isomer), 3.63-3.79 (m, 6H), 4.18-4.63 (m, 4H), 5.96 (s) and 6.53 (s) and 6.54 (s) (total 2H, isomer); 13C NMR (125.65 MHz, CDCl3)  13.8 and 13.8, 19.9 and 20.0, 29.7 and 30.7, 41.7 and 42.1, 44.2 and 45.2, 52.3 and 52.4 and 52.6, 108.8, 119.1 and 119.8, 122.3, 129.0, 156.8; IR (neat) 2959, 1700, 1475, 1229 cm-1; LRMS (FAB) m/e 368 (MH+), 367 (M+ - H), 237 (M+ - C6H12NO2); HRMS (FAB) calcd for C19H34N3O4 (MH+): 368.2549, found: 367.2475.

**2-(*N*-Butyl-*N*-methoxycarbonylaminomethyl)-5-(*N*-cyclohexyl-*N*-methoxycarbonylaminomethyl)thiophene (9).** A solution of thiophene (34.6 mg, 0.412 mmol) in CH2Cl2 (10 mL, cooled at -78 oC) and a cation pool (**2**, 10 mL, cooled at -78 oC) generated from **1** (0.498 mmol) were introduced to the micromixer, which was dipped in a coolant at -78 oC, by syringe pumps (flow rate, 5.0 mL/min). The mixture coming from outlet of the micromixer was collected with a round bottom flask and stirred for 1 min at -78 oC. Then, to the reaction mixture was immediately added a cation pool (**8**, 12.5 mL, cooled at -78 oC) which was generated from *N*-methoxycarbonyl-*N*-(trimethylsilylmetyl)cyclohexylamine (0.620 mmol) at -78 oC. Immediately after mixing, the reaction was quenched by the addition of Et3N and the mixture was warmed to room temperature. The solvent was removed under reduced pressure and the residue was quickly filtered through a short column (10 cm) of silica gel to remove Bu4NBF4.The silica gel was washed with ether (300 mL). After removal of the solvent, the crude product was purified with flash chromatography (hexane/ethylacetate 5:1) to obtain the title compound (105.2 mg, 64%): TLC *Rf* 0.32 (hexane/ethylacetate 3:1): 1H NMR (300 MHz, CDCl3)  0.89 (t, 3H, *J* = 7.5 Hz), 0.90-1.82 (m, 14H), 3.12-3.32 (m, 2H), 3.74 (s, 6H), 3.90-4.85 (m, 1H), 4.39-4.59 (m, 4H), 6.63-6.79 (m, 2H); 13C NMR (125.65 MHz, CDCl3)  13.7, 19.8, 25.3, 25.8, 30.0 and 30.1, 30.9 and 31.3, 42.0, 45.3, 45.7 and 46.4, 52.5, 56.4, 56.4, 124.5, 125.1 and 125.5, 139.8, 142.9, 156.2, 156.8; IR (neat) 2932, 1701, 1453, 1244 cm-1; LRMS (FAB) m/e 397 (MH+), 337 (M+ - CO2Me), 266 (M+ - C6H12NO2); HRMS (FAB) calcd for C20H33N2O4S (MH+): 397.2161, found: 397.2158.
